# Supplementary material for: Deep learning for in vitro prediction of pharmaceutical formulations
Source: PubMed Central journal article supplement — Acta Pharm Sin B. 2018 Sep 28;9(1):177–85. doi: 10.1016/j.apsb.2018.09.010 (PMC6362259; doi:10.1016/j.apsb.2018.09.010), 2018-09-28
Supplement: mmc1.pdf [file mmc1.pdf]

## Supplementary Information for

### Original Article

## Deep learning for *in vitro* prediction of pharmaceutical formulations

Yilong Yang<sup>a,b,†</sup>, Zhuyifan Ye<sup>a,†</sup>, Yan Su<sup>a</sup>, Qianqian Zhao<sup>a</sup>, Xiaoshan Li<sup>b</sup>, Defang Ouyang<sup>a,\*</sup>

<sup>a</sup>State Key Laboratory of Quality Research in Chinese Medicine, Institute of Chinese Medical Sciences (ICMS), University of Macau, Macau, China

<sup>b</sup>Department of Computer and Information Science, Faculty of Science and Technology, University of Macau, Macau, China

Received 28 July 2018; received in revised form 5 September 2018; accepted 5 September 2018

\*Corresponding author. Tel.: 853 88224514.

E-mail address: [defangouyang@umac.mo](mailto:defangouyang@umac.mo) (Defang Ouyang).

<sup>†</sup>These authors made equal contributions to this work.

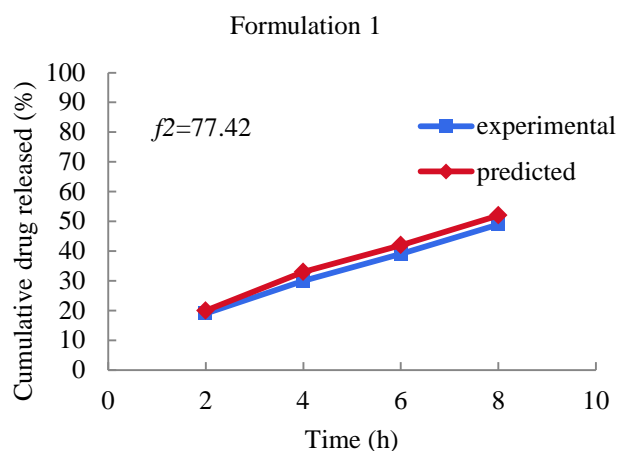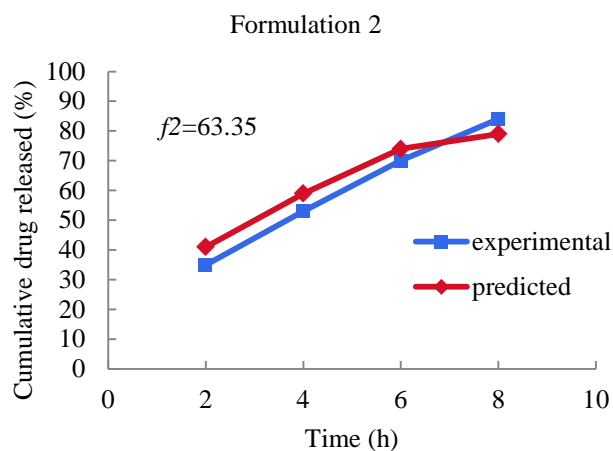

Formulation 3

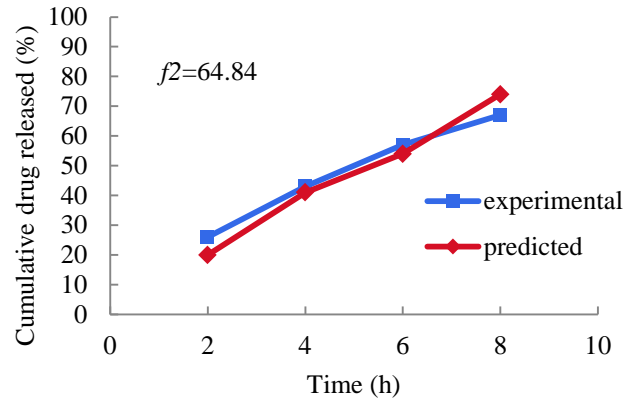

Formulation 4

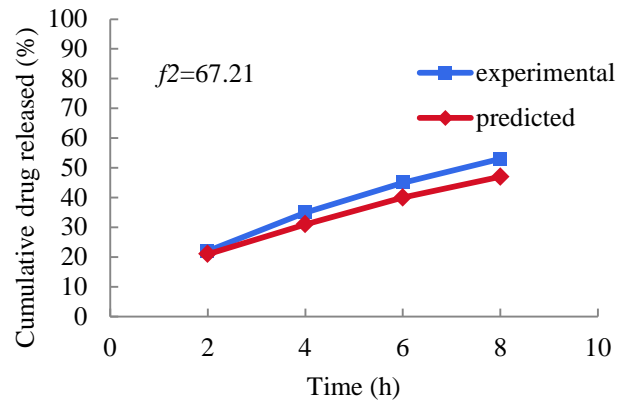

Formulation 5

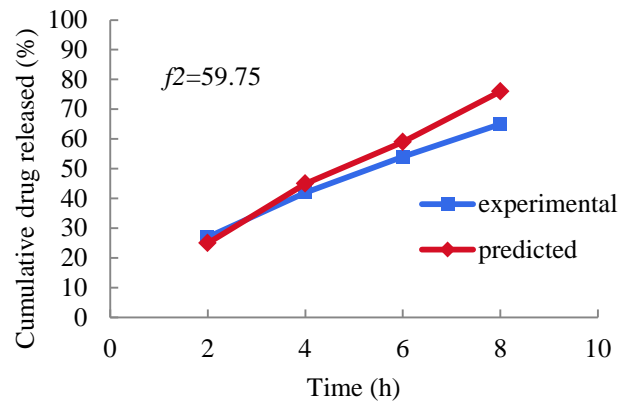

Formulation 6

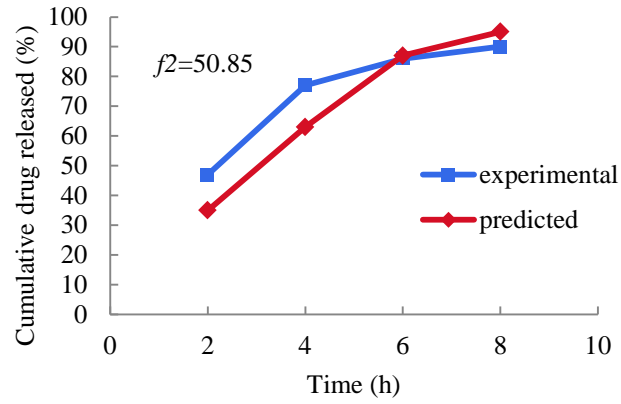

Formulation 7

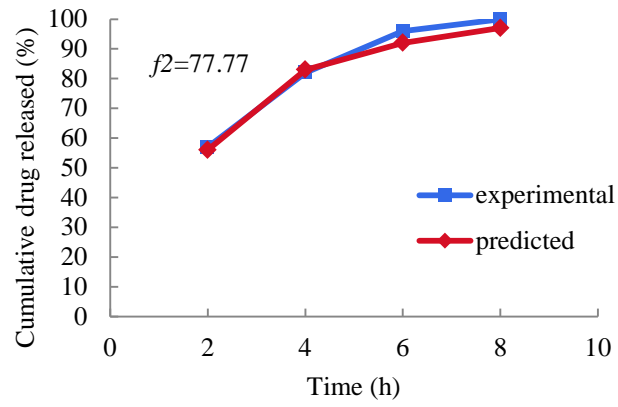

Formulation 8

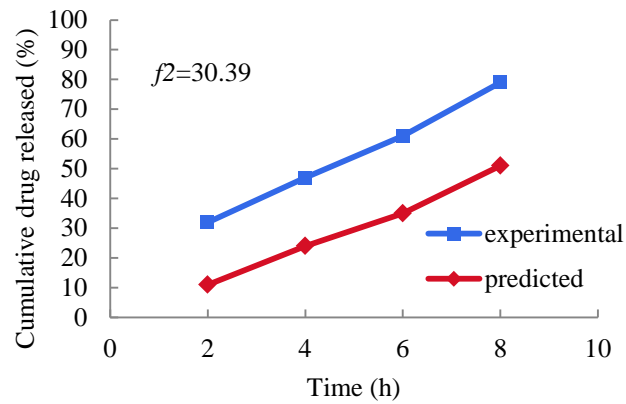

Formulation 9

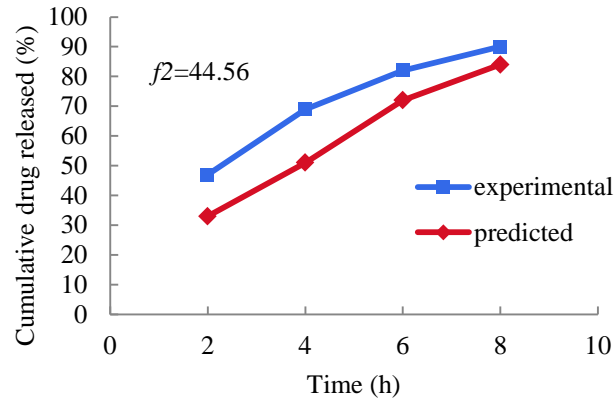

Formulation 10

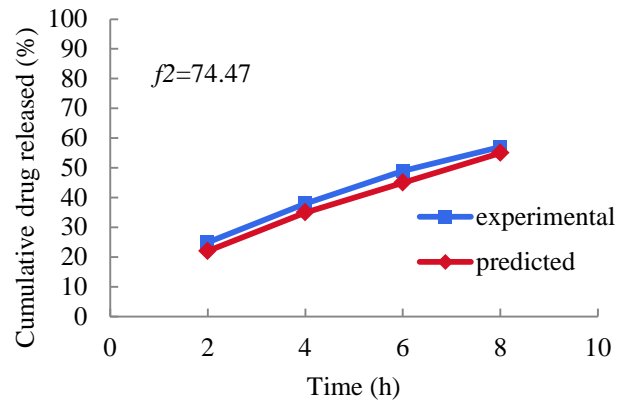

Formulation 11

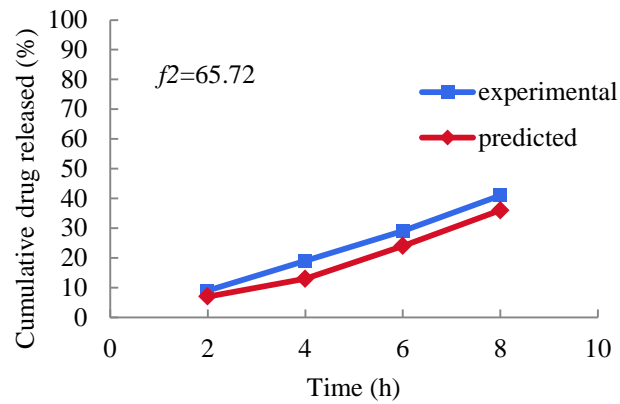

Formulation 12

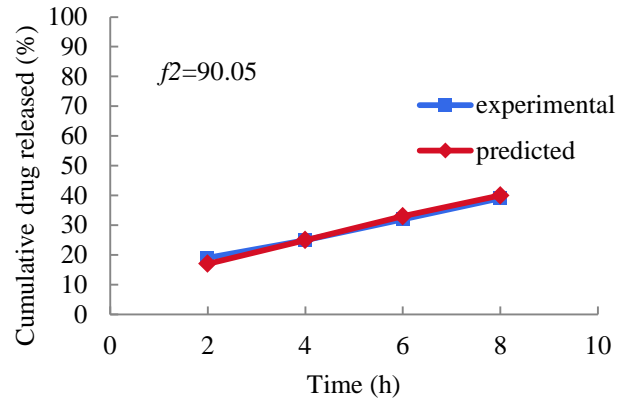

Formulation 13

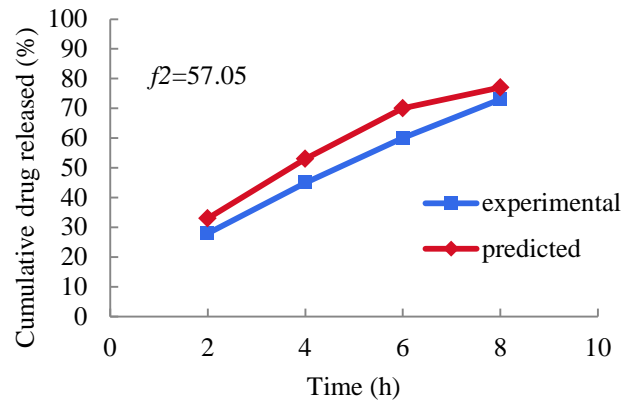

Formulation 14

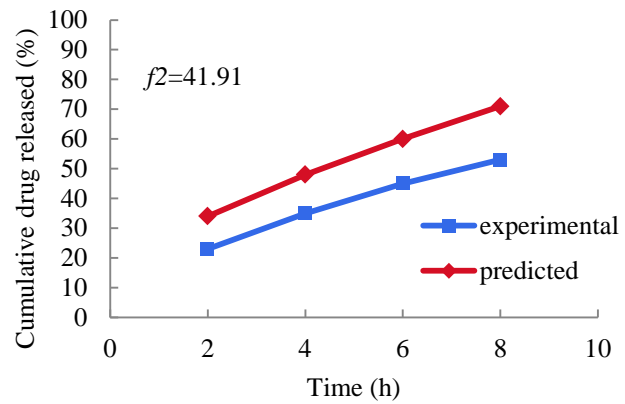

Formulation 15

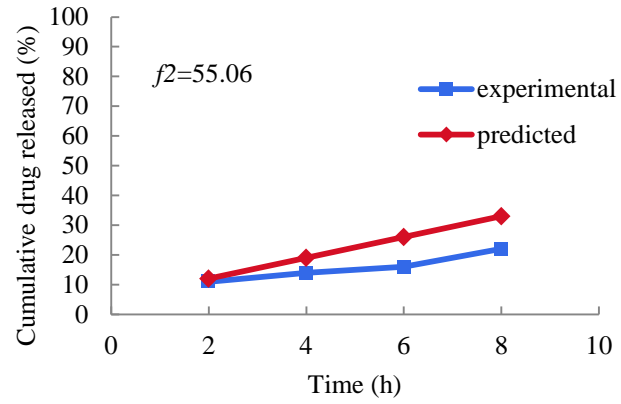

Formulation 16

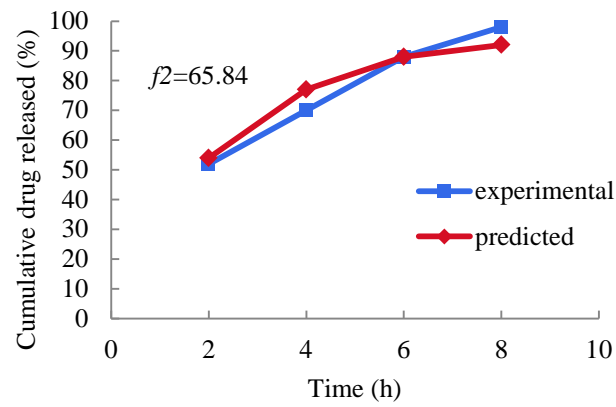

Formulation 17

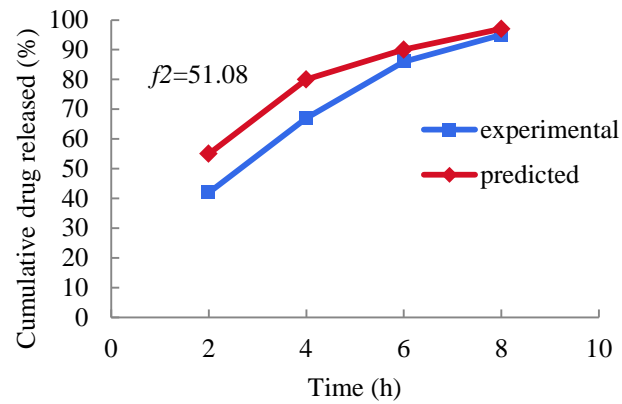

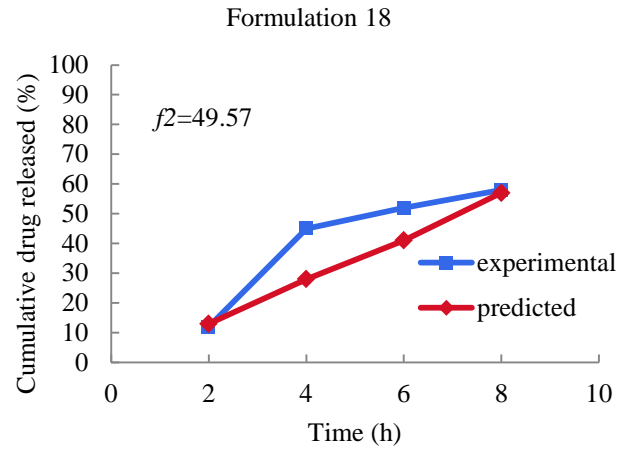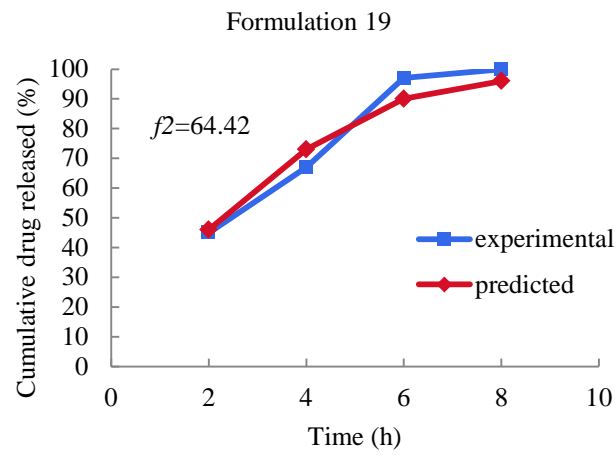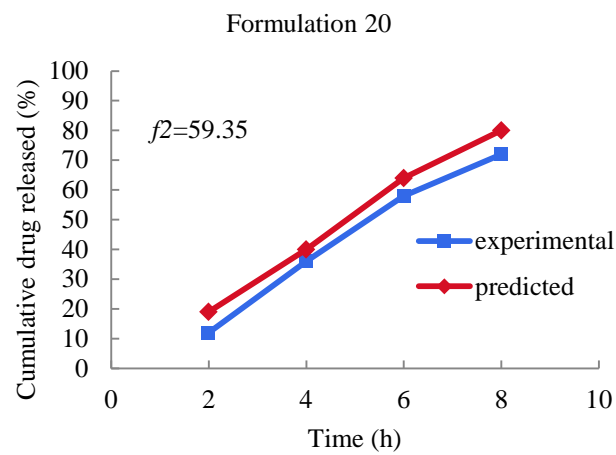

**Figure S1** Comparing the experimental- and the deep learning-predicted cumulative drug released curves of each SRMT formulation in the SRMT test set.
